# Supplementary material for: Top-Emitting Active-Matrix Quantum Dot Light-Emitting Diode Array with Optical Microcavity for Micro QLED Display
Source: MDPI journal article supplement (doi:10.3390/nano12152683), 2022-08-04
Supplement: s1 [file s1]

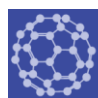

## Supporting Information

# Top-Emitting Active-Matrix Quantum Dot Light-Emitting Diode Array with Optical Microcavity for Micro QLED Display

Kuo-Yang Lai <sup>1</sup>, Shuan Yang <sup>2</sup>, Tung-Chang Tsai <sup>3</sup>, I-An Yao <sup>3</sup>, Chiu-Lien Yang <sup>3</sup>, Chih-Ching Chang <sup>4</sup> and Hsueh-Shih Chen <sup>1,\*</sup>

<sup>1</sup> Ph.D. Program in Prospective Functional Materials Industry, College of Engineering, National Tsing Hua University, Hsinchu 30013, Taiwan

<sup>2</sup> Department of Materials Science and Engineering, National Tsing Hua University, Hsinchu 30013, Taiwan

<sup>3</sup> Technology Development Division, Innolux Corporation, Miaoli 35053, Taiwan

<sup>4</sup> Hsinlight Inc., South Campus, National Tsing Hua University, Hsinchu 30013, Taiwan

\* Correspondence: chenhs@mx.nthu.edu.tw

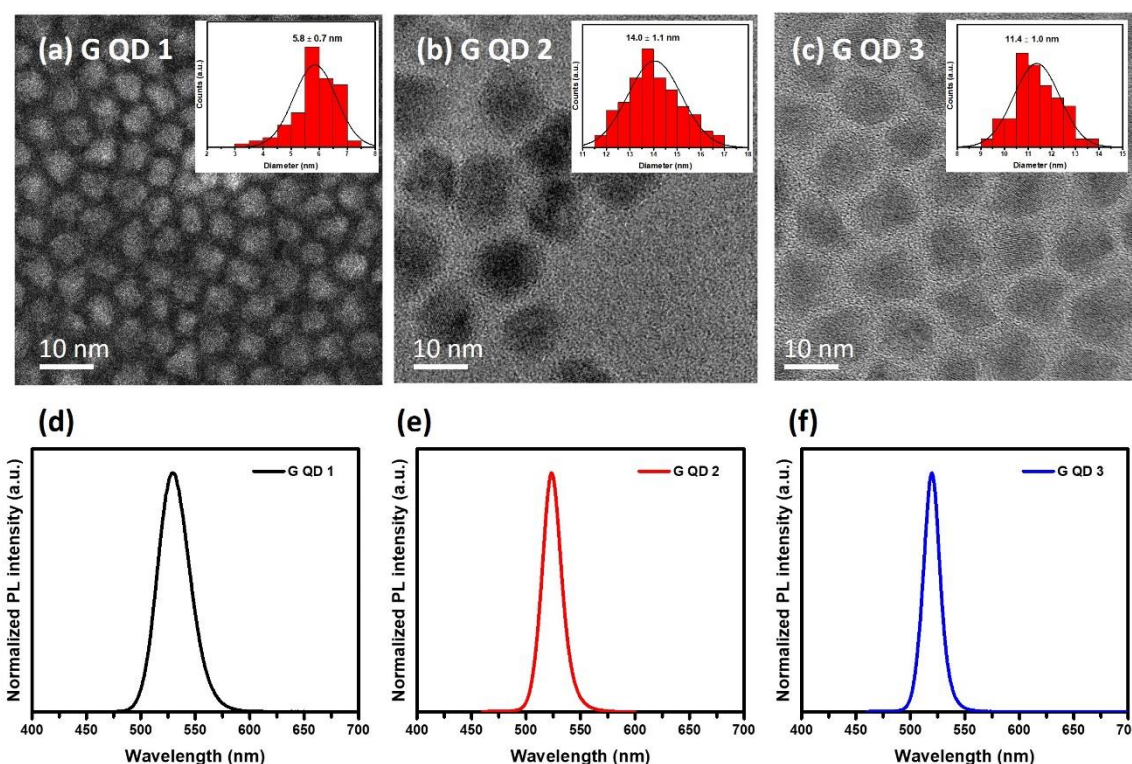

**Figure S1.** TEM image of dried ZnCdSe QD film with different shell thickness (a) 0.5 nm, (b) 1.0 nm and (c) 1.6 nm. The size distribution are shown in the insets, they are about 5.8, 14.0, and 11.4 nm for G-QD-1, G-QD-2, and G-QD-3 respectively. (d)–(f) show the optical properties for three kinds of QDs. All of QDs are treated with the same OA ligand for fairly comparison.

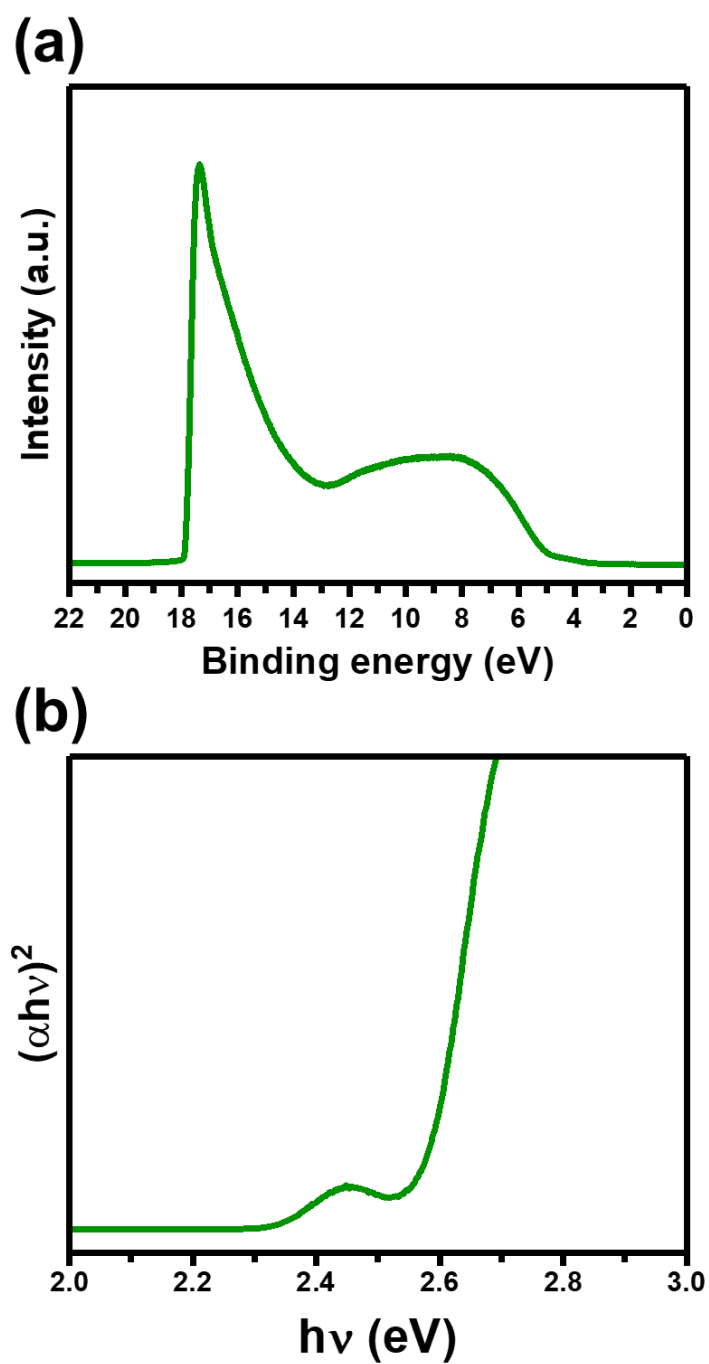

Figure S2. (a) UPS spectrum and (b) Tauc plot of the green QDs used in this work.

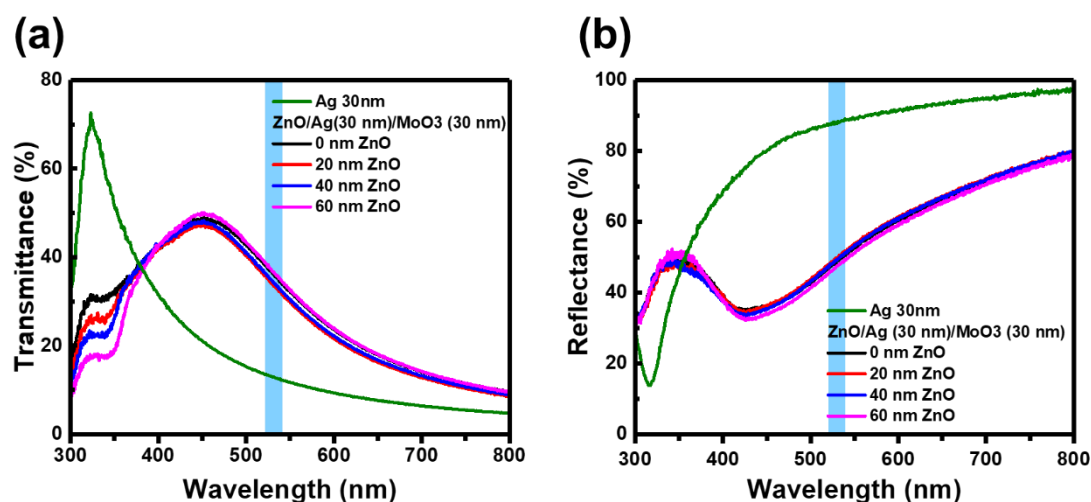

Figure S3. (a) The transmittance spectra and (b) the reflectance spectra of Ag and Ag/capping layer with different ZnO NPs thickness.

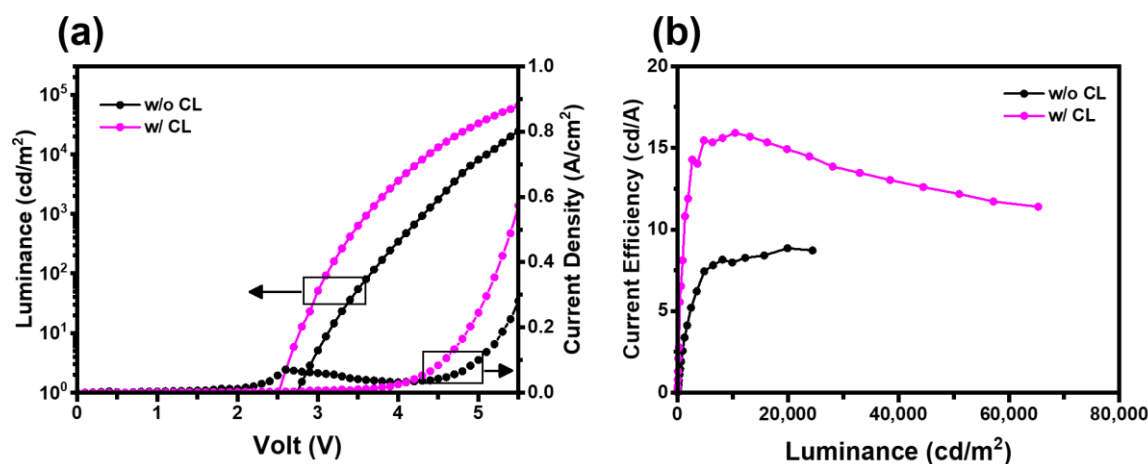

Figure S4. (a) Current density-voltage-luminance ( $J$ - $V$ - $L$ ) characteristics and (b) Luminance-current efficiency characteristics for the TEQLED devices with or without a capping layer (thickness  $\sim 30$  nm).

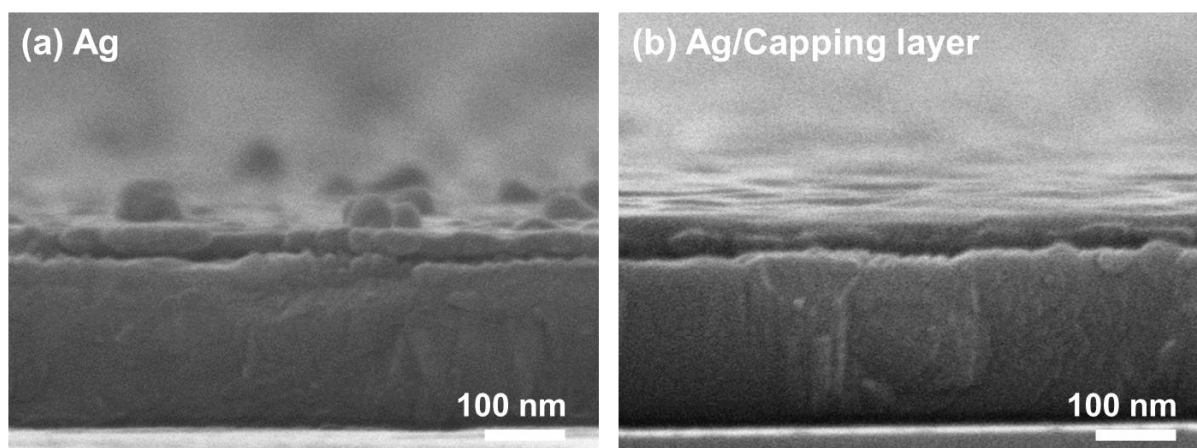

Figure S5. The cross-sectional SEM images of (a) Ag and (b) Ag/capping layer. The films are deposited on an ITO-coated glass substrate.
